# Supplementary material for: A controllable surface etching strategy for MOF-derived porous ZnCo2O4@ZnO/Co3O4 oxides and their sensing properties
Source: Royal Society of Chemistry journal article supplement (doi:10.1039/d3ra05135h), 2023-01-01
Supplement: d3ra05135h1.pdf [file d3ra05135h1.pdf]

## Supporting Information

### A Controllable Surface Etching Strategy for MOF-Derived Porous $\text{ZnCo}_2\text{O}_4@ \text{ZnO}/\text{Co}_3\text{O}_4$ Oxides and Their Sensing Properties

Wang Li<sup>ab\*</sup>, Yulin Guo<sup>a</sup>, Yan Liu<sup>a</sup>, Wen Yang<sup>a</sup>, Jiangwei Ma<sup>ab\*</sup>, Jifan Hu<sup>ab\*</sup>

<sup>a</sup> College of Materials Science and Engineering, Taiyuan University of Science and Technology, Taiyuan 030003, China

<sup>b</sup> Laboratory of Magnetic and Electric Functional Materials and the applications, The Key Laboratory of Shanxi Province, Taiyuan 030024, China

\*Corresponding author

E-mail address: [2019014@tyust.edu.cn](mailto:2019014@tyust.edu.cn)

## Results

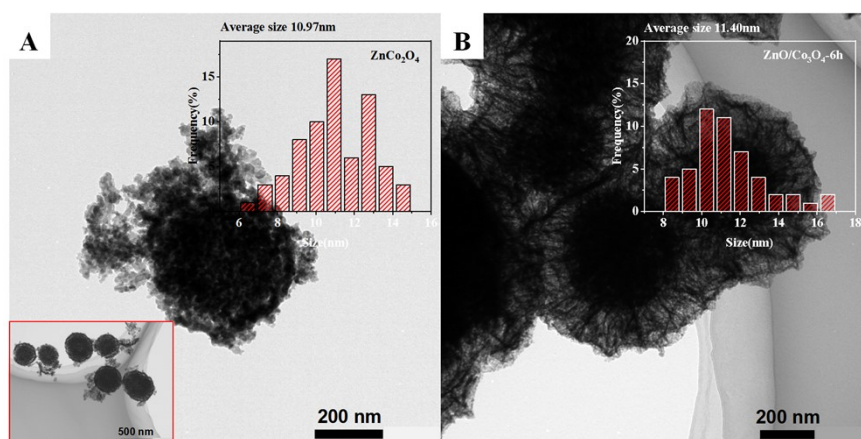

Fig. S1 TEM image of (A)  $\text{ZnCo}_2\text{O}_4$ , (B)  $\text{ZnCo}_2\text{O}_4@ \text{ZnO}/\text{Co}_3\text{O}_4$ -6h. (inset: metal oxide particle size distribution composed of  $\text{ZnCo}_2\text{O}_4$  and  $\text{ZnCo}_2\text{O}_4@ \text{ZnO}/\text{Co}_3\text{O}_4$ -6h).

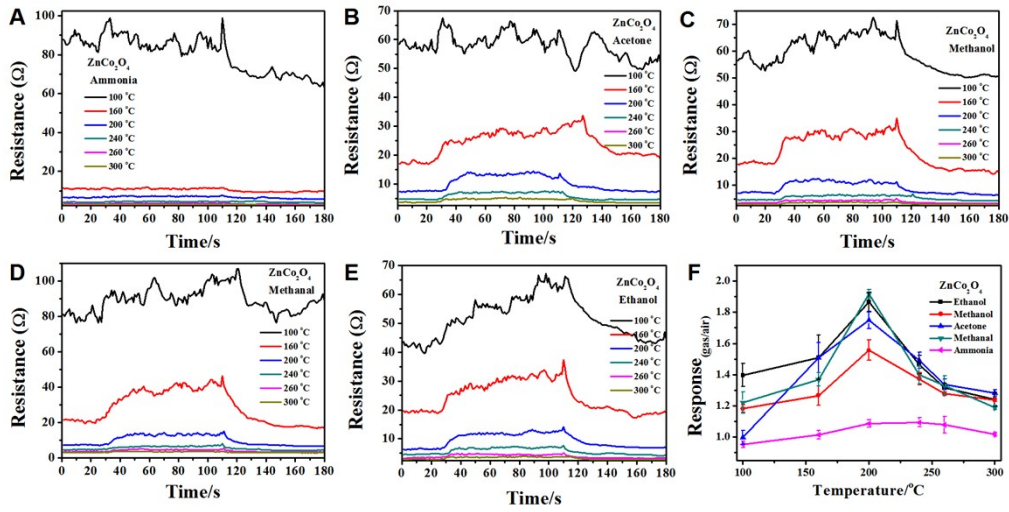

Fig. S2 Temperature dependent sensing results of  $\text{ZnCo}_2\text{O}_4$  for 100 ppm ethanol, methanal, acetone, methanol, and ammonia at different temperatures from 100-300 °C.

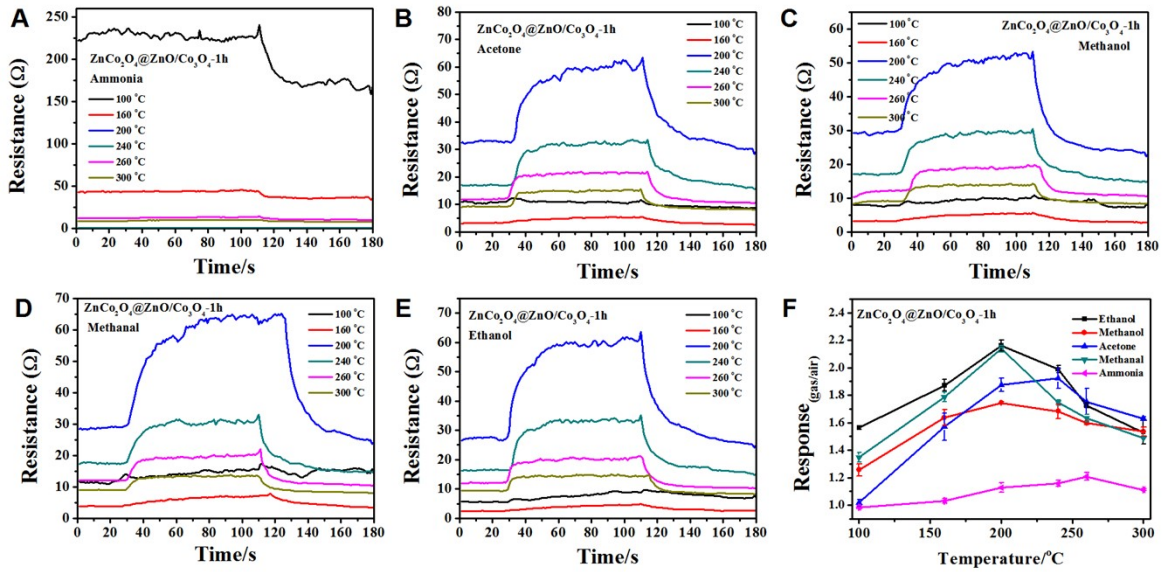

Fig. S3 Temperature dependent sensing results of  $\text{ZnCo}_2\text{O}_4@ZnO/\text{Co}_3\text{O}_4\text{-1h}$  for 100 ppm ethanol, methanal, acetone, methanol, and ammonia at different temperatures from 100-300 °C.

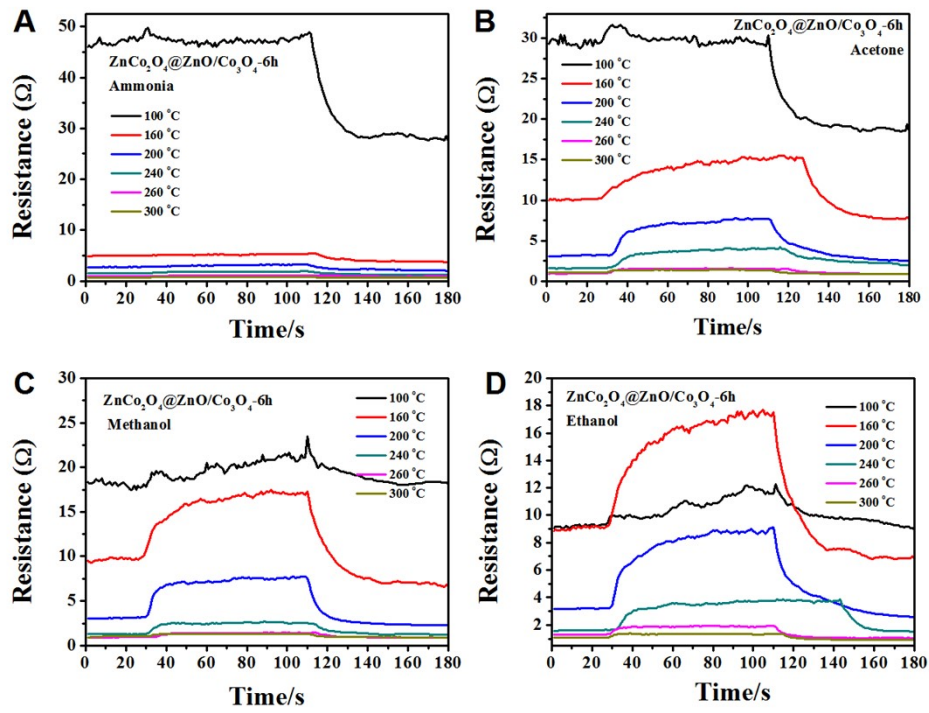

Fig. S4 Temperature dependent sensing results of  $\text{ZnCo}_2\text{O}_4@\text{ZnO}/\text{Co}_3\text{O}_4\text{-6h}$  for 100 ppm ethanol, methanol, acetone, methanol, and ammonia at different temperatures from 100-300 °C.
